# Supplementary material
Source: MDPI journal article supplement (https://www.mdpi.com/2076-3263/7/2/40)
Supplement: s1 [file s1]

Supplementary Materials: Fusion of Satellite Multispectral Images Based on Ground-Penetrating Radar (GPR) Data for the Investigation of Buried Concealed Archaeological Remains

Athos Agapiou, Vasiliki Lysandrou, Apostolos Sarris, Nikos Papadopoulos and Diofantos G. Hadjimitsis

**Table S1.** Vegetation indices applied in the study (see more details in [32]).

| **Vegetation Index** | **Equation** | **No** |
| --- | --- | --- |
| EVI (Enhanced Vegetation Index) | 2.5 (pNIR – pred)/(pNIR +6 pred – 7.5 pblue +1) |  |
| Green NDVI (Green Normalized Difference Vegetation Index) | (pNIR – pgreen)/( pNIR + pgreen) |  |
| NDVI (Normalized Difference Vegetation Index) | (pNIR – pred)/(pNIR + pred) |  |
| SR (Simple Ration)multispectral | pNIR/pred |  |
| MSR (Modified Simple Ratio) | pred/(pNIR/pred +1)0.5 |  |
| MTVI2 (Modified Triangular Vegetation Index) | [1.5(1.2*( pNIR – pgreen) – 2.5(pRed – pgreen)]/[(2 pNIR+1)2 – (6 pNIR – 5 pRed0.5) – 0.5]0.5 |  |
| RDVI (Renormalized Difference  Vegetation Index) | (pNIR – pred)/(pNIR + pred)1/2 |  |
| IRG (Red Green Ratio Index) | pRed – pgreen |  |
| PVI (Perpendicular Vegetation Index) | (pNIR –α pred – b)/(1+α2)  pNIR,soil = α pred,soil+b |  |
| RVI (Ratio Vegetation Index) | pred/pNIR |  |
| TSAVI (Transformed Soil Adjusted Vegetation Index) | [α(pNIR-α pNIR – b)]/[ (pred +α pNIR –αb+0.08(1+α2))]  pNIR,soil = α pred,soil+b |  |
| MSAVI (Modified Soil Adjusted Vegetation Index) | [2 pNIR+1-[(2 pNIR+1)2-8(pNIR - pred)]1/2]/ 2 |  |
| ARVI (Atmospherically Resistant Vegetation Index) | (pNIR - prb)/( pNIR + prb),  prb = pred – γ (pblue – pred) |  |
| GEMI (Global Environment Monitoring Index) | n(1-0.25n)( pred -0.125)/(1 − pred )  n = [2(pNIR2- pred2)+1.5 pNIR+0.5 pred]/(pNIR+ pred +0.5) |  |
| SARVI (Soil and Atmospherically Resistant Vegetation Index) | (1+0.5) (pNIR - prb)/( pNIR + prb +0.5)  prb = pred – γ (pblue – pred) |  |
| OSAVI (Optimized Soil Adjusted Vegetation Index) | (pNIR – pred)/(pNIR + pred +0.16) |  |
| DVI (Difference Vegetation Index) | pNIR - pred |  |
| SR × NDVI (Simple Ratio x Normalized Difference Vegetation Index | (pNIR2 – pred)/(pNIR + pred2) |  |
| CARI (Chlorophyll Absorption Ratio Index) | p700|α670+p670+b|/[p670(α2+1)0.5  α = (p700 – p550)/150  b = p550 – 550 α |  |
| GI (Greenness Index) | p554/p677 |  |
| GVI (Greenness Vegetation Index) | (p682−p553)/(p682+p553) |  |
| MCARI (Modified Chlorophyll Absorption Ratio Index) | [(P700−P670)−0.2(P700−P550)](P700/P670) |  |
| MCARI2 (Modified Chlorophyll Absorption Ratio Index) | 1.2[2.5(p800−p670)−1.3(p800−p550)] |  |
| mNDVI (Modified Normalized Difference Vegetation Index) | (p800− p680)/( p800+ p680−2 p445) |  |
| SR705 (Simple Ratio, Estimation of chlorophyll content) | p750/ p705 |  |
| mNDVI2 (Modified Normalized Difference Vegetation Index) | (p750− p705)/( p750+ p705−2 p445) |  |
| MSAVI (Improved Soil Adjusted Vegetation Index) | [2 p800+1-[(2 p800+1)2-8(p800 – p670)]1/2]/ 2 |  |
| mSR (Modified Simple Ratio) | (p800−p445)/(p680−p445) |  |
| mSR2 (Modified Simple Ratio) | (p800−p445)/(p680−p445) |  |
| mSR3 (Modified Simple Ratio) | (p800/p670 - 1)/ (p800/p670 + 1)0.5 |  |
| MTCI (MERIS Terrestrial Chlorophyll index) | (p754−p709)/(p709−p681) |  |
| mTVI (modified Triangular Vegetation Index) | 1.2[1.2(p800−p550)−2.5(p670−p550)] |  |
| NDVI (Normalized Difference Vegetation Index) | (p800−p670)/(p800+p670) |  |
| NDVI2 (Normalized Difference Vegetation Index) | (p750−p705)/(p750+p705) |  |
| OSAVI (Optimized Soil Adjusted Vegetation Index) | 1.16(p800−p670)/(p800+p670+0.16) |  |
| RDVI (Renormalized Difference Vegetation Index) | (p800−p670)/(p800+p670)0.5 |  |
| REP(Red-Edge Position) | 700+40[(p670 + p780)/2 – p700]/(p740 – p700) |  |
| SIPI (Structure Insensitive Pigment Index) | (p800−p450)/(p800−p650) |  |
| SIPI2 (Structure Insensitive Pigment Index) | (p800−p440)/(p800−p680) |  |
| SIPI3(Structure Insensitive Pigment Index) | (p800−p445)/(p800−p680) |  |
| SPVI (Spectral polygon vegetation index) | 0.4[3.7(p800−p670)−1.2|p530−p670|] |  |
| SR (Simple Ratio) hyperspectral | p800/ p680 |  |
| SR1 (Simple Ratio) | p750/ p700 |  |
| SR2 (Simple Ratio) | p752/ p690 |  |
| SR3 (Simple Ratio) | p750/ p550 |  |
| SR4 (Simple Ratio) | p672/ p550 |  |
| TCARI (Transformed Chlorophyll Absorption Ratio Index) | 3[(p700−p670)−0.2(p700−p550)(p700/p670)] |  |
| TSAVI (Transformed Soil Adjusted Vegetation Index) | [α(p875-α p680 –b)]/[ (p680 +α p875 –αb+0.08(1+α2))]  α = 1,062  b = 0.022 |  |
| TVI (Triangular Vegetation Index) | 0.5[120(p750−p550)−200(p670−p550)] |  |
| VOG (Vogelmann Indices) | p740/p720 |  |
| VOG2 (Vogelmann Indices) | (p734−p747)/(p715+p726) |  |
| ARI (Anthocyanin Reflectance Index ) | (1/p550)−(1/p700) |  |
| ARI2 (Anthocyanin Reflectance Index 2) | p800(1/p550)−(1/p700) |  |
| BGI (Blue Green Pigment Index) | p450/p550 |  |
| BRI (Blue Red Pigment Index) | p450/p690 |  |
| CRI (Carotenoid Reflectance Index) | (1/p510)−(1/p550) |  |
| RGI (Red/Green Index) | p690/p550 |  |
| CI (Curvature Index) | p675. p690/p2683 |  |
| LIC (Curvature Index) | p440/p690 |  |
| NPCI (Normalized Pigment Chlorophyll index) | (p680−p430)/(p680+p430) |  |
| NPQI (Normalized Phaeophytinization Index) | (p415−p435)/ (p415+p435) |  |
| PRI (Photochemical Reflectance Index) | (p531−p570)/(p531+p570) |  |
| PRI2 (Photochemical Reflectance Index) | (p570−p539)/(p570+p539) |  |
| PSRI (Plant Senescence Reflectance Index) | (p680−p500)/p750 |  |
| SR5 (Simple Ratio) | p690/p655 |  |
| SR6(Simple Ratio) | P685/p655 |  |
| VS (Vegetation Stress ratio) | P725/p702 |  |
| MVSR (Modified Vegetation Stress ratio) | P723/p700 |  |
| fWBI (floating Water Band Index) | p900/min p920−980 |  |
| WI (Water Index) | p900/p970 |  |
| SG (Sum Green Index) | mean of reflectance across the 500 nm to 600 nm |  |

Where pNIR is the near infrared reflectance; pred is the red reflectance; pgreen is the green reflectance; pblue is the blue reflectance; px is the reflectance at a specific wavelength.

© 2017 by the authors; licensee MDPI, Basel, Switzerland. This article is an open access article distributed under the terms and conditions of the Creative Commons Attribution (CC-BY) license (http://creativecommons.org/licenses/by/4.0/).
